# Supplementary material
Source: PubMed Central journal article supplement (PMC2764108)
Supplement: mmi0072-1408-SD1.pdf [file mmi0072-1408-SD1.pdf]

**Table S1:** Bacterial strains and plasmids

| Strain or Plasmid | Description                                                                                                                                                                    | Reference or Source             |
|-------------------|--------------------------------------------------------------------------------------------------------------------------------------------------------------------------------|---------------------------------|
| MC4100            | F- <i>araD139</i> $\Delta$ (argF-lac)U139 <i>rspL150 relA1 fibB5301 ptsF25 deoC1 thi-1 rbsR</i>                                                                                | (Casadaban, 1976)               |
| JM109             | e14.(McrA-) <i>recA1 endA1 gyrA96 thi-1 hsdR17</i> ( $r_K^- m_K^+$ ) <i>supE44 relA1</i> $\Delta$ ( <i>lac-proAB</i> ) [F' <i>traD36 proAB lacI<sub>q</sub></i> $\Delta$ M15]. | Promega                         |
| RAM1292           | MC4100 $\Delta$ <i>ara714</i>                                                                                                                                                  | (Werner and Misra, 2005)        |
| BTH101            | F- <i>cya99 araD139 galE15 galK16 rpsL1</i> ( <i>Str</i> ' ) <i>hsdR2 mcrA1 mcrB1</i>                                                                                          | EUROMEDEX                       |
| BL21(DE3)         | F-, <i>ompT, hsdS<sub>B</sub></i> ( $r_B^-$ , $m_B^-$ ), <i>dcm, gal, <math>\lambda</math></i> (DE3)                                                                           | Novagen                         |
| RAM1318           | MC4100 $\Delta$ <i>bamB::scar degP::Tn10</i>                                                                                                                                   | (Charlson <i>et al.</i> , 2006) |
| RAM1503           | RAM1292 / pBAD24                                                                                                                                                               | This Study                      |
| RAM1504           | RAM1292 / pBAD24- <i>mzrA</i>                                                                                                                                                  | This Study                      |
| RAM1505           | RAM1292 / pBAD24- <i>mzrA</i> (FLAG)                                                                                                                                           | This Study                      |
| RAM1506           | RAM1292 / pBAD33                                                                                                                                                               | This Study                      |
| RAM1507           | RAM1292 / pBAD33- <i>mzrA</i> (FLAG)                                                                                                                                           | This Study                      |
| RAM1508           | RAM1292 $\Delta$ <i>mzrA::scar</i>                                                                                                                                             | This Study                      |
| RAM1509           | RAM1508/ pBAD33                                                                                                                                                                | This Study                      |
| RAM1510           | RAM1508/ pBAD33- <i>mzrA</i> (FLAG)                                                                                                                                            | This Study                      |
| RAM1511           | RAM1508 $\Delta$ <i>omr::lacZ</i>                                                                                                                                              | This Study                      |
| RAM1512           | RAM1292 $\Delta$ <i>yqj::lacZ</i>                                                                                                                                              | This Study                      |
| RAM1513           | RAM1512 <i>zii::Tn10</i>                                                                                                                                                       | This Study                      |
| RAM1514           | RAM1512 <i>cpxA* zii::Tn10</i>                                                                                                                                                 | This Study                      |
| RAM1515           | RAM1512 $\Delta$ <i>cpxR::Cm<sup>r</sup> zii::Tn10</i>                                                                                                                         | This Study                      |
| RAM1516           | RAM1292 <i>zii::Tn10</i>                                                                                                                                                       | This Study                      |
| RAM1517           | RAM1292 <i>cpxA* zii::Tn10</i>                                                                                                                                                 | This Study                      |
| RAM1518           | RAM1516 $\Delta$ <i>mzrA::scar</i>                                                                                                                                             | This Study                      |
| RAM1519           | RAM1517 $\Delta$ <i>mzrA::scar</i>                                                                                                                                             | This Study                      |
| RAM1520           | RAM1516 $\Delta$ <i>envZ::Cm<sup>r</sup></i>                                                                                                                                   | This Study                      |
| RAM1521           | RAM1517 $\Delta$ <i>envZ::Cm<sup>r</sup></i>                                                                                                                                   | This Study                      |
| RAM1522           | RAM1292 $\Delta$ <i>omr::lacZ</i>                                                                                                                                              | This Study                      |
| RAM1523           | RAM1522 / pBAD24                                                                                                                                                               | This Study                      |
| RAM1524           | RAM1522 / pBAD24- <i>mzrA</i>                                                                                                                                                  | This Study                      |
| RAM1525           | RAM1522 <i>zii::Tn10</i>                                                                                                                                                       | This Study                      |
| RAM1526           | RAM1522 <i>cpxA* zii::Tn10</i>                                                                                                                                                 | This Study                      |
| RAM1527           | RAM1522 $\Delta$ <i>cpxR::Cm<sup>r</sup> zii::Tn10</i>                                                                                                                         | This Study                      |
| RAM1528           | RAM1525 $\Delta$ <i>mzrA::scar</i>                                                                                                                                             | This Study                      |
| RAM1529           | RAM1526 $\Delta$ <i>mzrA::scar</i>                                                                                                                                             | This Study                      |
| RAM1530           | RAM1292 <i>ompR101</i>                                                                                                                                                         | This Study                      |
| RAM1531           | RAM1530 / pTrc99A                                                                                                                                                              | This Study                      |
| RAM1532           | RAM1530 / pTrc99A- <i>mzrA</i> (FLAG)                                                                                                                                          | This Study                      |
| RAM1533           | RAM1530 $\Delta$ <i>omr::lacZ</i>                                                                                                                                              | This Study                      |
| RAM1534           | RAM1292 <i>ompR472</i>                                                                                                                                                         | This Study                      |
| RAM1535           | RAM1534 / pTrc99A                                                                                                                                                              | This Study                      |
| RAM1536           | RAM1534 / pTrc99A- <i>mzrA</i> (FLAG)                                                                                                                                          | This Study                      |
| RAM1537           | RAM1292 $\Delta$ <i>envZ::scar</i>                                                                                                                                             | This Study                      |
| RAM1538           | RAM1537 / pTrc99A                                                                                                                                                              | This Study                      |
| RAM1539           | RAM1537 / pTrc99A- <i>mzrA</i> (FLAG)                                                                                                                                          | This Study                      |
| RAM1540           | RAM1537 $\Delta$ <i>omr::lacZ</i>                                                                                                                                              | This Study                      |
| RAM1541           | RAM1292 <i>envZ</i> [R397L]                                                                                                                                                    | This Study                      |
| RAM1542           | RAM1541 $\Delta$ <i>omr::lacZ</i>                                                                                                                                              | This Study                      |
| RAM1543           | BTH101 / pKT25 pUT18C                                                                                                                                                          | This Study                      |
| RAM1544           | BTH101 / pKT25 <i>mzrA</i> and pUT18C                                                                                                                                          | This Study                      |
| RAM1545           | BTH101 / pKT25 <i>mzrA</i> and pUT18 <i>CenvZ</i>                                                                                                                              | This Study                      |
| RAM1546           | BTH101 / pKT25 <i>mzrA</i> and pUT18 <i>envZ</i>                                                                                                                               | This Study                      |

|         |                                                                              |            |
|---------|------------------------------------------------------------------------------|------------|
| RAM1547 | BTH101 / pKT25 <i>mzrA</i> and pUT18 <i>CompR</i>                            | This Study |
| RAM1548 | BTH101 / pKT25 <i>mzrA</i> and pUT18 <i>ompR</i>                             | This Study |
| RAM1549 | BTH101 / pKT25 <i>envZ</i> and pUT18 <i>envZ</i>                             | This Study |
| RAM1551 | RAM1292 $\Delta$ <i>ppiA::lacZ</i>                                           | This Study |
| RAM1552 | RAM1551/ pBAD24                                                              | This Study |
| RAM1553 | RAM1551/ pBAD24- <i>mzrA</i>                                                 | This Study |
| RAM1554 | RAM1292 $\Delta$ <i>ompF::lacZ</i>                                           | This Study |
| RAM1555 | RAM1554 / pBAD24                                                             | This Study |
| RAM1556 | RAM1554 / pBAD24- <i>mzrA</i>                                                | This Study |
| RAM1557 | RAM1292 <i>mgrB::<math>\lambda</math>placMu55</i>                            | This Study |
| RAM1558 | RAM1557 / pBAD24                                                             | This Study |
| RAM1559 | RAM1557 / pBAD24- <i>mzrA</i>                                                | This Study |
| RAM1560 | RAM1292 <i>mgtA::<math>\lambda</math>placMu55</i>                            | This Study |
| RAM1561 | RAM1560 / pBAD24                                                             | This Study |
| RAM1562 | RAM1560 / pBAD24- <i>mzrA</i>                                                | This Study |
| RAM1563 | RAM1292 / pBAD24- <i>mzrA::phoA</i>                                          | This Study |
| RAM1564 | RAM1292 / pBAD24- <i>mzrA</i> [\Delta13-28]:: <i>phoA</i>                    | This Study |
| RAM1565 | RAM1292 <i>dsbA::Kan<sup>r</sup></i> / pBAD24- <i>mzrA::phoA</i>             | This Study |
| RAM1566 | RAM1292 / pBAD24- <i>mzrA::lacZ<math>\alpha</math></i>                       | This Study |
| RAM1567 | RAM1292 / pBAD24- <i>mzrA</i> [\Delta13-28]:: <i>lacZ<math>\alpha</math></i> | This Study |
| RAM1568 | JM109 pBAD24                                                                 | This Study |
| RAM1569 | JM109 pBAD24- <i>mzrA</i>                                                    | This Study |
| RAM1570 | JM109 pBAD24- <i>mzrA::lacZ<math>\alpha</math></i>                           | This Study |
| RAM1571 | JM109 pBAD24- <i>mzrA</i> [\Delta13-28]:: <i>lacZ<math>\alpha</math></i>     | This Study |
| RAM1572 | RAM1540 / pBAD24                                                             | This Study |
| RAM1573 | RAM1540 / pBAD24- <i>mzrA</i>                                                | This Study |
| RAM1574 | RAM1292 $\Delta$ <i>rseA::scar</i>                                           | This Study |
| RAM1575 | RAM1574 $\Delta$ <i>yqj::lacZ</i>                                            | This Study |
| RAM1576 | RAM1292/ pTrc99A                                                             | This Study |
| RAM1577 | RAM1292/ pTrc99A- <i>mzrA</i> (FLAG)                                         | This Study |
| RAM1578 | RAM1318/ pBR322                                                              | This Study |
| RAM1579 | RAM1318/ pBR322 <i>exuT'exuRyqjABCDE'</i>                                    | This Study |
| RAM1580 | RAM1292 $\lambda$ RS88 <i>cpxP'-lacZ nadA::Tn10</i>                          | This Study |
| RAM1581 | RAM1580/ pBAD24                                                              | This Study |
| RAM1582 | RAM1580/ pBAD24- <i>mzrA</i> (FLAG)                                          | This Study |
| RAM1583 | RAM1530 $\Delta$ <i>yqj::lacZ</i>                                            | This Study |
| RAM1584 | RAM1537 $\Delta$ <i>yqj::lacZ</i>                                            | This Study |
| RAM1585 | RAM1541 $\Delta$ <i>yqj::lacZ</i>                                            | This Study |
| RAM1586 | RAM1292 <i>envZ11</i>                                                        | This Study |
| RAM1587 | RAM1586 $\Delta$ <i>yqj::lacZ</i>                                            | This Study |

#### Plasmids

|                                                     |                                                                    |                               |
|-----------------------------------------------------|--------------------------------------------------------------------|-------------------------------|
| pBAD24                                              | Amp <sup>r</sup> ; Expression vector; arabinose inducible          | (Guzman <i>et al.</i> , 1995) |
| pBAD33                                              | Cm <sup>r</sup> ; Expression vector; arabinose inducible           | (Guzman <i>et al.</i> , 1995) |
| pTrc99A                                             | Amp <sup>r</sup> ; Expression vector; IPTG inducible               | GE Healthcare                 |
| pBAD33 <i>mzrA</i> -FLAG                            | Cm <sup>r</sup> ; pBAD33 containing the <i>mzrA</i> (FLAG) gene    | This Study                    |
| pBAD24 <i>mzrA</i>                                  | Amp <sup>r</sup> ; pBAD24 containing the <i>mzrA</i> gene          | This Study                    |
| pBAD24 <i>mzrA</i> -FLAG                            | Amp <sup>r</sup> ; pBAD24 containing the <i>mzrA</i> (FLAG) gene   | This Study                    |
| pBAD24 <i>mzrA</i> - <i>phoA</i>                    | Amp <sup>r</sup> ; pBAD24- <i>mzrA::phoA</i>                       | This Study                    |
| pBAD24 <i>mzrA</i> [\Delta13-28]- <i>phoA</i>       | Amp <sup>r</sup> ; pBAD24- <i>mzrA</i> [\Delta13-28]:: <i>phoA</i> | This Study                    |
| pBAD24 <i>mzrA</i> - <i>lacZ<math>\alpha</math></i> | Amp <sup>r</sup> ; pBAD24- <i>mzrA::lacZ<math>\alpha</math></i>    | This Study                    |

|                                              |                                                                                                  |                                   |
|----------------------------------------------|--------------------------------------------------------------------------------------------------|-----------------------------------|
| pBAD24 <i>mzrA</i> [Δ13-28]- <i>lacZα</i>    | Amp <sup>r</sup> ; pBAD24- <i>mzrA</i> [Δ13-28]:: <i>lacZα</i>                                   | This Study                        |
| pTrc99A <i>mzrA</i> -FLAG                    | Amp <sup>r</sup> ; pTrc99A containing the <i>mzrA</i> (FLAG) gene                                | This Study                        |
| pKD3                                         | Cm <sup>r</sup> ; Plasmid carrying Cm <sup>r</sup> gene cassette                                 | (Datsenko and Wanner, 2000)       |
| pKD4                                         | Kan <sup>r</sup> ; Plasmid carrying Kan <sup>r</sup> gene cassette                               | (Datsenko and Wanner, 2000)       |
| pKD46                                        | Amp <sup>r</sup> ; Red recombinase expression plasmid                                            | (Datsenko and Wanner, 2000)       |
| pCP20                                        | Cm <sup>r</sup> and Amp <sup>r</sup> ; FLP recombinase expression plasmid, temperature sensitive | (Datsenko and Wanner, 2000)       |
| pKG136                                       | <i>ahp</i> FRT <i>lacZY</i> <sup>+</sup> t <sub>his</sub> oriR6K                                 | (Ellermeier <i>et al.</i> , 2002) |
| pKT25                                        | Kan <sup>r</sup> ; Harbors the T25 fragment of adenylate cyclase from <i>B. pertussis</i>        | EUROMEDEX                         |
| pUT18                                        | Amp <sup>r</sup> ; Harbors the T18 fragment of adenylate cyclase from <i>B. pertussis</i>        | EUROMEDEX                         |
| pUT18C                                       | Amp <sup>r</sup> ; Harbors the T18 fragment of adenylate cyclase from <i>B. pertussis</i>        | EUROMEDEX                         |
| pKT25 <i>mzrA</i>                            | Kan <sup>r</sup> ; pKT25 with the <i>mzrA</i> gene                                               | This Study                        |
| pKT25 <i>envZ</i>                            | Kan <sup>r</sup> ; pKT25 with the <i>envZ</i> gene                                               | This Study                        |
| pKT25 <i>ompR</i>                            | Kan <sup>r</sup> ; pKT25 with the <i>ompR</i> gene                                               | This Study                        |
| pUT18C <i>mzrA</i>                           | Amp <sup>r</sup> ; pUT18C with the <i>mzrA</i> gene                                              | This Study                        |
| pUT18C <i>envZ</i>                           | Amp <sup>r</sup> ; pUT18C with the <i>envZ</i> gene                                              | This Study                        |
| pUT18C <i>ompR</i>                           | Amp <sup>r</sup> ; pUT18C with the <i>ompR</i> gene                                              | This Study                        |
| pUT18C <i>cpxA</i>                           | Amp <sup>r</sup> ; pUT18C with the <i>cpxA</i> gene                                              | This Study                        |
| PUT18 <i>envZ</i>                            | Amp <sup>r</sup> ; pUT18 with the <i>envZ</i> gene                                               | This Study                        |
| pUT18 <i>ompR</i>                            | Amp <sup>r</sup> ; pUT18 with the <i>ompR</i> gene                                               | This Study                        |
| pUT18 <i>cpxA</i>                            | Amp <sup>r</sup> ; pUT18 with the <i>cpxA</i> gene                                               | This Study                        |
| pBR322                                       | Amp <sup>r</sup> ; Tet <sup>r</sup> cloning vector                                               | (Bolivar, <i>et al.</i> 1977)     |
| pBR322- <i>exuT'</i><br><i>exuRyqjABCDE'</i> | Amp <sup>r</sup> ; pBR322 with <i>exuT'</i> <i>exuRyqjABCDE'</i> genes                           | This Study                        |

1. Bolivar F, Rodriguez RL, Green PJ, Betlach MC, Heyneker HL, Boyer HW, Crosa JH, and Falkow S. (1977) Construction and characterization of new cloning vehicles. II. A multipurpose cloning system. *Gene* **2**, 95–113.
2. Casadaban M J (1976) Transposition and fusion of the lac genes to select promoters in *Escherichia coli* using bacteriophage lambda and Mu. *J Mol Biol* **141**:541-555.
3. Charlson E S, Werner J N, Misra R (2006) Differential effects of *yfgL* mutation on the biogenesis of *Escherichia coli* outer membrane proteins and lipopolysaccharide. *J Bacteriol* **188**:7186-7194.
4. Datsenko K A, Wanner B L (2000) One-step inactivation of chromosomal genes in *Escherichia coli* K-12 using PCR products. *Proc Natl Acad Sci USA* **97**:6640-6645.
5. Ellermeier C D, Janakiraman A, Slauch J M (2002) Construction of targeted single copy *lac* fusions using λ Red and FLP-mediated site-specific recombination in bacteria. *Gene* **290**:153-161.
6. Guzman L M, Belin D, Carson M J, Beckwith J (1995) Tight regulation, modulation, and high-level expression by vectors containing the arabinose P<sub>BAD</sub> promoter. *J Bacteriol* **177**:4121-4130.
7. Werner J, Misra R (2005) YaeT (Omp85) affects the assembly of lipid-dependent and lipid-independent outer membrane proteins of *Escherichia coli*. *Mol Microbiol* **57**:1450-1459.

**Table S2:** Primers used for cloning and deletion

| <b>Deletion Primers</b>                                                    |                                                                      |                                                                           |
|----------------------------------------------------------------------------|----------------------------------------------------------------------|---------------------------------------------------------------------------|
| Primer Name                                                                | Sequence (5'-3')                                                     |                                                                           |
| <i>yqjA</i> Fwd                                                            | GTTAACCGATTACCAGGAATAATGAATGGAACTTTTGTGTAGGCTGGA<br>GCTGCTTCG        |                                                                           |
| <i>mzrA</i> Fwd                                                            | GAAATATGGAAATCGGGGGTAAGGGATGCAAATATGTAGGCTGGAGCT<br>GCTTCG           |                                                                           |
| <i>mzrA</i> Rev                                                            | GTGAGTGATATGTTTCGGATAACAGGAAGTTACATATGAATATCCTCCTT<br>AG             |                                                                           |
| <i>envZ</i> Fwd                                                            | CTTTGTACCGGACGGCTCTAAAGCATGAGGCGATTGCGCTTCTGTAGGCT<br>GGAGCTGCTTCG   |                                                                           |
| <i>envZ</i> Rev                                                            | ACCTTCGCCTCCCGTTTATTTACCCTTCTTTTGTGCGTCCCATATGAATAT<br>CCTCCTTAG     |                                                                           |
| <i>omrB</i> Fwd                                                            | CCGCTGGTGGCGTTTGGCTTCAGGTTGCTAAAGTGGTGATTGTAGGCTGG<br>AGCTGCTTCG     |                                                                           |
| <i>omrA</i> Rev                                                            | ACACGAGATAAAGAACGCGAGCGACAGTAAATTAGGTGCGCATATGAA<br>TATCCTCCTTAG     |                                                                           |
| <i>cpxR</i> Fwd                                                            | TTTCTGCCTCGGAGGTATTTAAACAATGAATAAAATCCTGTGTAGGCTGG<br>AGCTGCTTCG     |                                                                           |
| <i>cpxR</i> Rev                                                            | AGATGGCGAAGATGCGCGCGTTAAGCTGCCTATCATGAAGCCATCATA<br>TGAATATCCTCCTTAG |                                                                           |
| <i>rseA</i> Fwd                                                            | GGATACTGGATAAGGGTATTAGGCATGCAGAAATGTGTAGGCTGGAGCT<br>GCTTCG          |                                                                           |
| <i>rseA</i> Rev                                                            | CCAAAGTTGCTTCATTACTGCGATTGCGTTCCTAACATATGAATATCCTC<br>CTTAG          |                                                                           |
| <b>Expression Vector Primers</b> (restriction sites shown in lower case)   |                                                                      |                                                                           |
| Primer Name                                                                | Sequence(5'-3')                                                      | Cloning Vector                                                            |
| <i>mzrA</i> EcoRI Fwd                                                      | AGGAGgaatcACCATGCAAATACCTCGC                                         | pBAD24                                                                    |
| <i>mzrA</i> XbaI Fwd                                                       | TGCAtctagaAATATGGAAATCGGGGGTAAGGGATGC<br>AAATA                       | pBAD24 and<br>pBAD33                                                      |
| <i>mzrA</i> HindIII Rev                                                    | CGATCaagcttGAGTGATATGTTTCGGATAAC                                     | pBAD24                                                                    |
| <i>mzrA</i> -FLAG HindIII<br>Rev                                           | CGATCaagcttACTTATCGTCGTCGTCCTTGTAGTCAC<br>CGAAGCGATGAGAGTTATC        | pBAD24 and<br>pBAD33                                                      |
| <i>mzrA</i> XbaI Rev                                                       | CAGTtctagaTCCGAAGCGATGAGAGTTATC                                      | pBAD24                                                                    |
| <i>phoA</i> XbaI Fwd                                                       | ATAtctagaATGCCTGTTCTGGAAAACCGG                                       | pBAD24 <i>mzrA</i>                                                        |
| <i>phoA</i> Sall Rev                                                       | ATATgtcgacTTATTTCAGCCCCAGAGCG                                        | pBAD24 <i>mzrA</i>                                                        |
| <b>Two Hybrid System Primers</b> (restriction sites shown in lower case)   |                                                                      |                                                                           |
| Primer Name                                                                | Sequence (5'-3')                                                     | Cloning Vector                                                            |
| <i>mzrA</i> E2HS XbaI Fwd                                                  | AGCTGtctagaGCAAATACCTCGCATGTTCG                                      | pUT18C and pKT25                                                          |
| <i>mzrA</i> E2HS KpnI Rev                                                  | GCAGTggtaccCCGAAGCGATGAGAGTTATCCCG                                   | pUT18C and pKT25                                                          |
| <i>envZ</i> E2HS XbaI Fwd                                                  | AGCTGtctagacAGGAGGTTGCGCTTCTCGCCACG                                  | pUT18, pUT18C and<br>pKT25                                                |
| <i>envZ</i> E2HS KpnI Rev                                                  | GCAGTggtaccCCTTCTTTTGTGCGTGCCCTGC                                    | pUT18, pUT18C and<br>pKT25                                                |
| <i>ompR</i> E2HS XbaI Fwd                                                  | AGCTGtctagaGCAAGAGAACTACAAGATTCTGG                                   | pUT18, pUT18C                                                             |
| <i>cpxA</i> E2HS XbaI Fwd                                                  | ACGTGtctagaGATAGGCAGCTTAACCGCGCG                                     | pUT18, pUT18C, and<br>pKNT25                                              |
| <i>cpxA</i> E2HS KpnI Fwd                                                  | GCAGTggtaccCGACTCCtTTATACAGCGGC                                      | pUT18, pUT18C, and<br>pKNT25                                              |
| <b>Site-Directed Mutagenesis Primers</b> (alterations shown in lower case) |                                                                      |                                                                           |
| Primer Name                                                                | Sequence (5'-3')                                                     | Cloning Vector                                                            |
| <i>mzrA</i> Δ13-28 SDM<br>Fwd                                              | CGCATGTCGCTTCGCCAGCTAGCCTCCGCGGTTTCG<br>CCAGCAAGAGTC                 | pBAD24 <i>mzrA</i> :: <i>phoA</i> ,<br>pBAD24 <i>mzrA</i> :: <i>lacZα</i> |
| <i>mzrA</i> Δ13-28 SDM<br>Rev                                              | GACTCTTGCTGGCGAACCGCGGAGGCTAGCTGGCG<br>AAGCGACATGCG                  | pBAD24 <i>mzrA</i> :: <i>phoA</i> ,<br>pBAD24 <i>mzrA</i> :: <i>lacZα</i> |
| EnvZ R397L Fwd                                                             | GCGGCGACAGcGCaCtCACCATTAGCGGCACGGGAT                                 | pETEnvZc                                                                  |

EnvZ R397L Rev TAGGG  
CCCTAATCCCGTGCCGCTAATGGTGAgtGCgCTGTC pETEnvZc  
GCCGC

---
